# Supplementary material for: Uncovering the selectivity mechanism of phosphodiesterase 7A/8A inhibitors through computational studies
Source: Royal Society of Chemistry journal article supplement (doi:10.1039/d3cp03913g), 2024-01-01
Supplement: d3cp03913g1.pdf [file d3cp03913g1.pdf]

## Supporting information

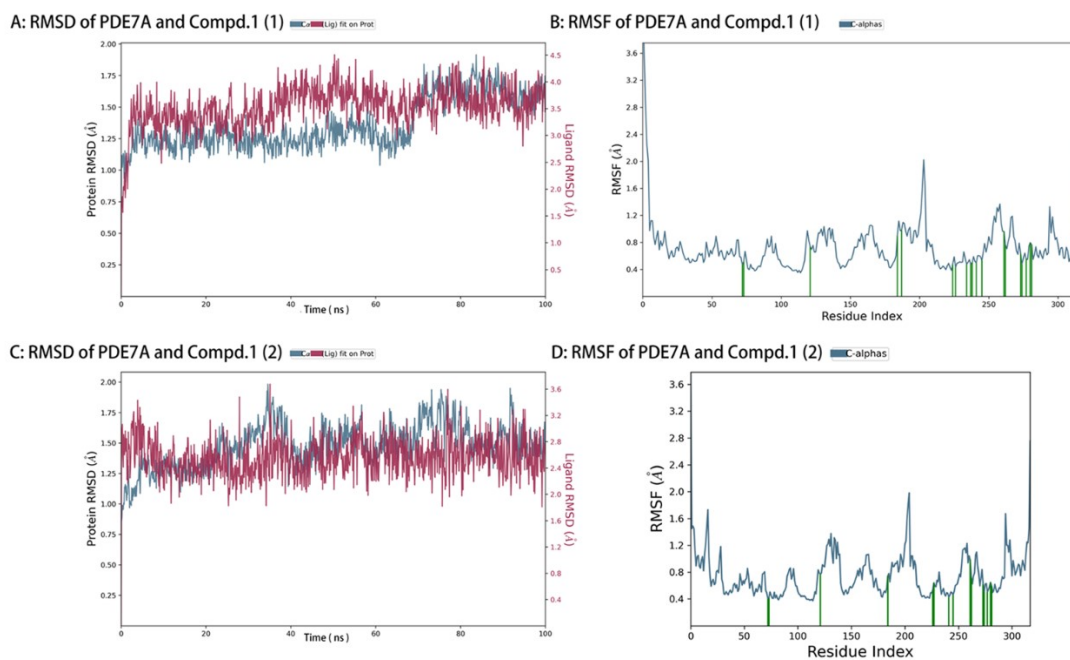

Figure S 1 Molecular dynamics supplement of PDE7A-Compd.1

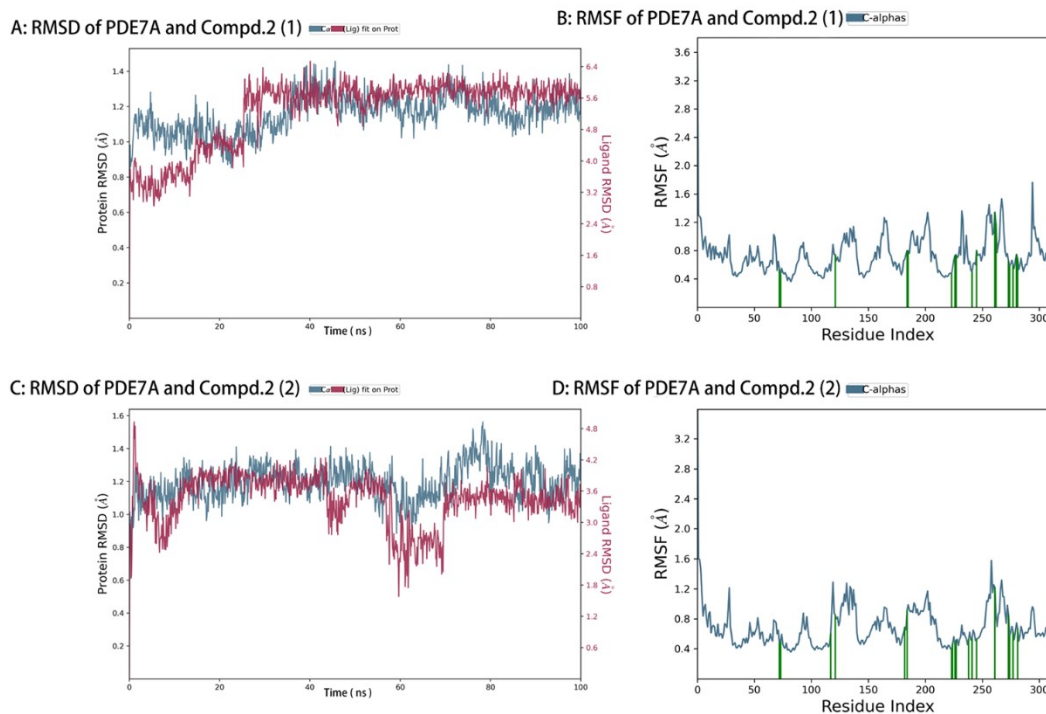

Figure S 2 Molecular dynamics supplement of PDE7A-Compd.2

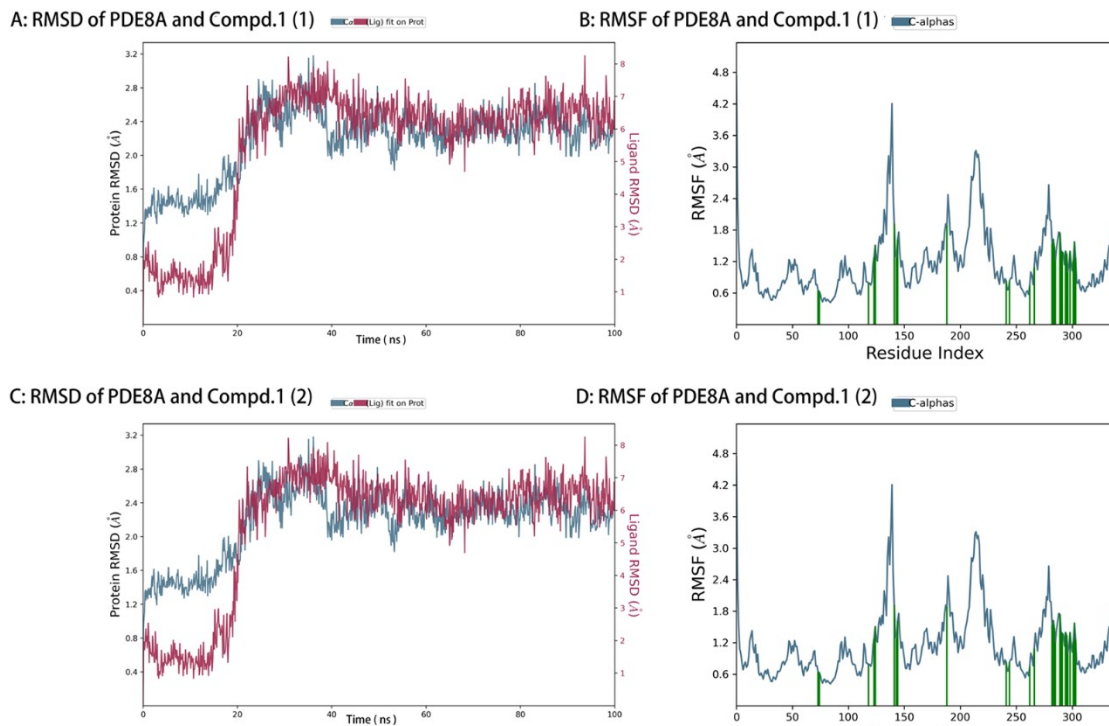

**Figure S 3** Molecular dynamics supplement of PDE8A-Compd. 1

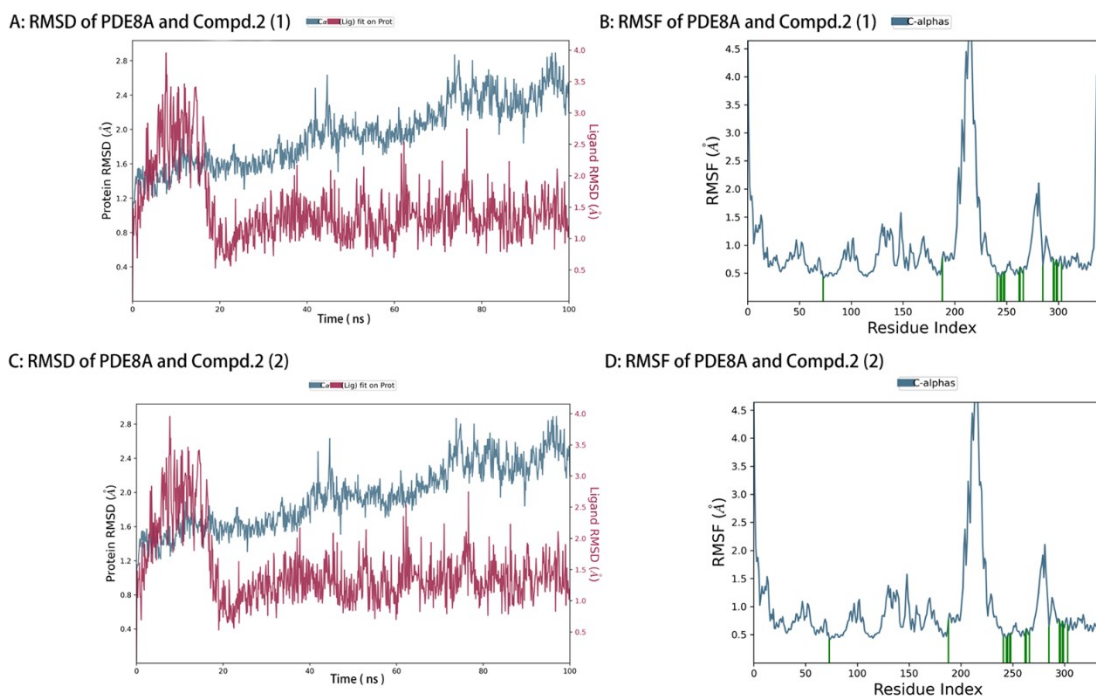

**Figure S 4** Molecular dynamics supplement of PDE8A-Compd. 2
